# Supplementary material
Source: PubMed Central journal article supplement (PMC5493144)
Supplement: NIHMS871763-supplement-Supporting_Information.pdf [file NIHMS871763-supplement-Supporting_Information.pdf]

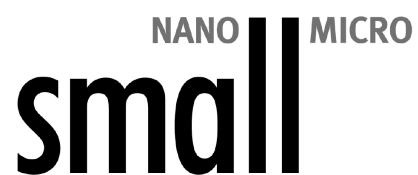

## Supporting Information

for *Small*, DOI: 10.1002/sml.201603847

The Impact of Protein Corona Formation on the Macrophage Cellular Uptake and Biodistribution of Spherical Nucleic Acids

*Alyssa B. Chinen, Chenxia M. Guan, Caroline H. Ko, and Chad A. Mirkin\**

## Supporting Information

**The Impact of Protein Corona Formation on the Macrophage Cellular Uptake and Biodistribution of Spherical Nucleic Acids***Alyssa B. Chinen, Chenxia M. Guan, Caroline H. Ko, and Chad A. Mirkin\****General Information****Table S1.** DNA Sequences Used

| Name   | Sequence (5'-3')                                             |
|--------|--------------------------------------------------------------|
| G-rich | (GGT) <sub>4</sub> TGT(GGT) <sub>4</sub> T <sub>13</sub> -SH |
| Poly-T | T <sub>40</sub> -SH                                          |

**Methods*****Quantification of Au Content in Tissues by ICP-MS***

Tissue and blood samples collected from mice were prepared for determination of Au content by ICP-MS by first weighing the tissue. Samples were dried in an oven at 65°C overnight. Samples were weighed again and digested in 3% HCl in HNO<sub>3</sub> using a Milestone EthosEZ Microwave Digestion System. Samples were diluted in ICP wash solution (2% HNO<sub>3</sub> and 2% HCl in water) and analyzed using a ThermoFisher X Series II ICP-MS and 5% In, 5% Bi, and 5% Ho as internal standards.

***Pharmacokinetic Modeling***

To calculate pharmacokinetic parameters, the data were fit to a one-compartment model using non-linear regression analysis in GraphPad Prism. This model assumes that NPs are transported between the central and peripheral compartments with first-order kinetics and that NPs are eliminated from the central compartment with first-order kinetics. The data were fit to equation S1, where Cp is the concentration of the particles in blood; A and B are hybrid coefficients;  $\alpha$  and  $\beta$  are rate constants for the distribution and elimination processes, respectively; and t is the time component.

$$C_p = Ae^{-\alpha t} + Be^{-\beta t} \quad (\text{Eqn. S1})$$

Pharmacokinetic parameters were estimated using standard calculations. An initial data point at t=0 was included representing 100% of the injected dose in the blood.

***Circular Dichroism***

Free DNA and SNAs were prepared in 1X PBS at a concentration of 7.5 $\mu$ M and 50nM, respectively to normalize the measurement by oligonucleotide concentration. Samples were measured using a JASCO J-815 CD Spectrometer. Scans were taken from 230-300 nm with a 2nm bandwidth and a scanning speed of 100nm/minute. The data integration

time was set to 2 seconds and measurements were made every 0.025nm. The spectra shown are the results of averaging 20 runs.

**Results**

**Table S2.** Characterization of SNA loading

|            | Diameter (nm) | Zeta Potential (mV) | DNA Strands/AuNP |
|------------|---------------|---------------------|------------------|
| G-rich SNA | 54±8          | -21.1±0.6           | 134±17           |
| Poly-T SNA | 56±3          | -23.2±0.8           | 132±18           |

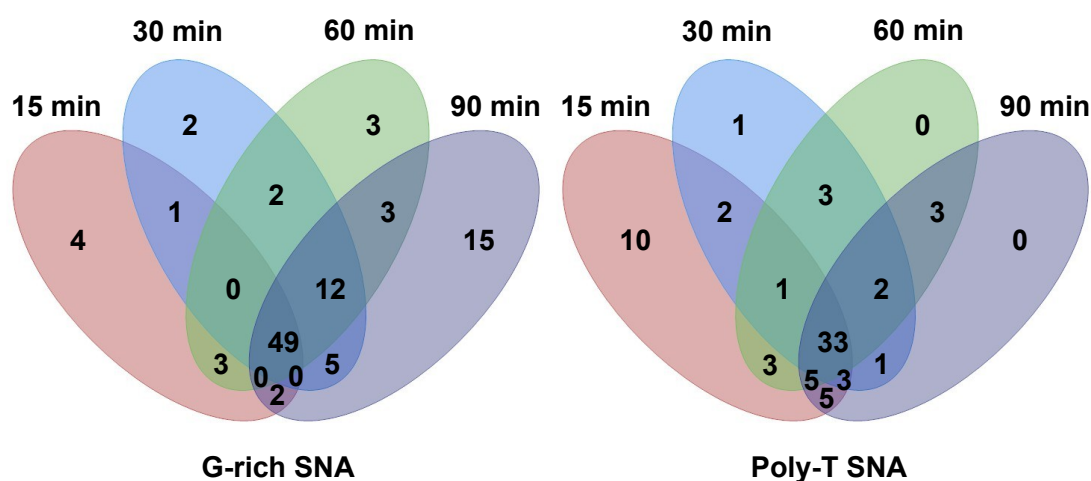

**Figure S1.** Four-unit venn diagram depicting the number of unique proteins that bind to SNAs over time for (A) G-rich SNAs and (B) poly-T SNAs over time. The plot suggests that more types of proteins bind to G-rich SNAs, and that a protein exchange is occurring on the nanoparticle over time. This trend is not followed by poly-T SNAs, which has fewer proteins binding, and very little evidence of an exchange occurring on the nanoparticle.

**Table S3.** List of proteins bound to G-rich SNAs after a 15-min incubation in human serum

| Accession | Description      | Coverage | # Unique Peptides | # Peptides | # PSMs | MW [kDa] |
|-----------|------------------|----------|-------------------|------------|--------|----------|
| P01008    | Antithrombin-III | 62.28    | 27                | 27         | 543    | 52.6     |
| P02768    | Serum albumin    | 70.94    | 37                | 37         | 303    | 69.3     |

|        |                                              |       |    |    |     |       |
|--------|----------------------------------------------|-------|----|----|-----|-------|
| P04114 | Apolipoprotein B-100                         | 36.64 | 99 | 99 | 231 | 515.3 |
| P01024 | Complement C3                                | 50.63 | 57 | 57 | 218 | 187.0 |
| P00734 | Prothrombin                                  | 45.02 | 23 | 23 | 163 | 70.0  |
| P02647 | Apolipoprotein A-I                           | 60.30 | 20 | 20 | 105 | 30.8  |
| P04264 | Keratin, type II cytoskeletal 1              | 45.19 | 18 | 21 | 88  | 66.0  |
| P08603 | Complement factor H                          | 40.78 | 28 | 32 | 84  | 139.0 |
| P04004 | Vitronectin                                  | 31.59 | 11 | 12 | 63  | 54.3  |
| P01009 | Alpha-1-antitrypsin                          | 47.13 | 16 | 16 | 61  | 46.7  |
| P13645 | Keratin, type I cytoskeletal 10              | 40.24 | 15 | 16 | 60  | 58.8  |
| P35527 | Keratin, type I cytoskeletal 9               | 56.02 | 18 | 18 | 54  | 62.0  |
| P0COL5 | Complement C4-B                              | 22.42 | 22 | 22 | 46  | 192.6 |
| P01042 | Kininogen-1                                  | 21.12 | 12 | 12 | 45  | 71.9  |
| P01871 | Ig mu chain C region                         | 30.31 | 3  | 9  | 45  | 49.3  |
| P01023 | Alpha-2-macroglobulin                        | 25.85 | 22 | 22 | 44  | 163.2 |
| Q14624 | Inter-alpha-trypsin inhibitor heavy chain H4 | 23.44 | 13 | 13 | 43  | 103.3 |
| P02652 | Apolipoprotein A-II                          | 57.00 | 5  | 5  | 40  | 11.2  |
| P10909 | Clusterin                                    | 28.73 | 11 | 11 | 37  | 52.5  |
| P27169 | Serum paraoxonase/arylesterase 1             | 45.35 | 9  | 9  | 36  | 39.7  |
| P02787 | Serotransferrin                              | 34.81 | 16 | 16 | 35  | 77.0  |
| P35908 | Keratin, type II cytoskeletal 2 epidermal    | 33.96 | 12 | 14 | 34  | 65.4  |
| P01834 | Ig kappa chain C region                      | 80.19 | 6  | 6  | 32  | 11.6  |
| P02765 | Alpha-2-HS-glycoprotein                      | 40.87 | 7  | 7  | 31  | 39.3  |
| P02655 | Apolipoprotein C-II                          | 52.48 | 5  | 5  | 31  | 11.3  |
| Q9BXR6 | Complement factor H-related protein 5        | 33.39 | 10 | 11 | 30  | 64.4  |
| P0CG05 | Ig lambda-2 chain C regions                  | 65.09 | 4  | 4  | 30  | 11.3  |
| P04003 | C4b-binding protein alpha chain              | 32.33 | 12 | 12 | 27  | 67.0  |
| P02649 | Apolipoprotein E                             | 37.22 | 8  | 8  | 20  | 36.1  |
| P06727 | Apolipoprotein A-IV                          | 25.25 | 8  | 8  | 20  | 45.4  |
| Q5T985 | Inter-alpha-trypsin inhibitor heavy chain H2 | 17.11 | 8  | 8  | 17  | 105.2 |
| P02766 | Transthyretin                                | 59.86 | 7  | 7  | 16  | 15.9  |
| P04196 | Histidine-rich glycoprotein                  | 13.52 | 6  | 6  | 16  | 59.5  |
| P00739 | Haptoglobin-related protein                  | 41.95 | 6  | 8  | 16  | 39.0  |
| P01876 | Ig alpha-1 chain C region                    | 37.96 | 7  | 7  | 15  | 37.6  |
| P01857 | Ig gamma-1 chain C region                    | 27.27 | 3  | 6  | 15  | 36.1  |
| P05546 | Heparin cofactor 2                           | 17.84 | 6  | 6  | 14  | 57.0  |
| P02760 | Protein AMBP                                 | 25.00 | 6  | 6  | 14  | 39.0  |
| G5E9F8 | Protein S (Alpha), isoform CRA_b             | 21.47 | 7  | 7  | 13  | 60.3  |
| P08697 | Alpha-2-antiplasmin                          | 25.05 | 6  | 6  | 13  | 54.5  |
| K7ERI9 | Truncated apolipoprotein C-I (Fragment)      | 31.17 | 4  | 4  | 13  | 8.6   |
| D6RBJ7 | Vitamin D-binding protein                    | 18.39 | 3  | 3  | 12  | 38.8  |
| J3QLC9 | Haptoglobin (Fragment)                       | 25.21 | 3  | 5  | 12  | 40.8  |
| P07996 | Thrombospondin-1                             | 8.21  | 6  | 6  | 11  | 129.3 |

|        |                                    |       |   |   |    |       |
|--------|------------------------------------|-------|---|---|----|-------|
| F5H7E1 | Uncharacterized protein            | 10.85 | 5 | 5 | 11 | 72.1  |
| O95445 | Apolipoprotein M                   | 32.98 | 4 | 4 | 11 | 21.2  |
| P08779 | Keratin, type I cytoskeletal 16    | 12.68 | 4 | 5 | 10 | 51.2  |
| P12259 | Coagulation factor V               | 2.65  | 4 | 4 | 10 | 251.5 |
| B4E1H2 | Plasma protease C1 inhibitor       | 12.95 | 4 | 4 | 9  | 49.7  |
| P02749 | Beta-2-glycoprotein 1              | 22.32 | 4 | 4 | 8  | 38.3  |
| P01019 | Angiotensinogen                    | 11.34 | 3 | 3 | 8  | 53.1  |
| P02790 | Hemopexin                          | 13.85 | 4 | 4 | 7  | 51.6  |
| P18428 | Lipopolysaccharide-binding protein | 9.77  | 3 | 3 | 7  | 53.3  |
| P02656 | Apolipoprotein C-III               | 46.46 | 3 | 3 | 7  | 10.8  |
| O75636 | Ficolin-3                          | 21.07 | 3 | 3 | 6  | 32.9  |
| P09871 | Complement C1s subcomponent        | 6.69  | 3 | 3 | 6  | 76.6  |
| Q16610 | Extracellular matrix protein 1     | 12.59 | 3 | 3 | 6  | 60.6  |
| O43866 | CD5 antigen-like                   | 17.00 | 3 | 3 | 6  | 38.1  |
| F5GXS5 | Apolipoprotein F                   | 26.95 | 3 | 3 | 4  | 33.4  |

**Table S4.** List of proteins bound to G-rich SNAs after a 30-min incubation in human serum

| Accession | Description                                  | Coverage | # Unique Peptides | # Peptides | # PSMs | MW [kDa] |
|-----------|----------------------------------------------|----------|-------------------|------------|--------|----------|
| P01008    | Antithrombin-III                             | 66.16    | 31                | 31         | 647    | 52.6     |
| P04114    | Apolipoprotein B-100                         | 41.99    | 126               | 126        | 352    | 515.3    |
| P01024    | Complement C3                                | 54.30    | 64                | 64         | 255    | 187.0    |
| P02647    | Apolipoprotein A-I                           | 71.91    | 26                | 26         | 251    | 30.8     |
| P00734    | Prothrombin                                  | 48.07    | 25                | 25         | 209    | 70.0     |
| P02768    | Serum albumin                                | 73.56    | 40                | 40         | 175    | 69.3     |
| P13645    | Keratin, type I cytoskeletal 10              | 53.60    | 25                | 27         | 105    | 58.8     |
| P04264    | Keratin, type II cytoskeletal 1              | 48.45    | 20                | 23         | 101    | 66.0     |
| P08603    | Complement factor H                          | 41.27    | 33                | 36         | 95     | 139.0    |
| K7ER74    | Protein APOC4-APOC2                          | 37.08    | 6                 | 8          | 88     | 20.0     |
| P35908    | Keratin, type II cytoskeletal 2 epidermal    | 60.09    | 22                | 26         | 76     | 65.4     |
| P04004    | Vitronectin                                  | 22.38    | 8                 | 9          | 73     | 54.3     |
| P10909    | Clusterin                                    | 33.18    | 16                | 16         | 65     | 52.5     |
| P01871    | Ig mu chain C region                         | 36.73    | 12                | 12         | 62     | 49.3     |
| F5GXS0    | Complement C4-B                              | 21.08    | 3                 | 23         | 62     | 187.6    |
| P01009    | Alpha-1-antitrypsin                          | 50.24    | 18                | 18         | 57     | 46.7     |
| P01042    | Kininogen-1                                  | 25.62    | 14                | 14         | 57     | 71.9     |
| Q14624    | Inter-alpha-trypsin inhibitor heavy chain H4 | 25.91    | 15                | 15         | 56     | 103.3    |
| P02652    | Apolipoprotein A-II                          | 57.00    | 5                 | 5          | 56     | 11.2     |
| P35527    | Keratin, type I cytoskeletal 9               | 57.14    | 20                | 21         | 54     | 62.0     |

|        |                                              |       |    |    |    |       |
|--------|----------------------------------------------|-------|----|----|----|-------|
| P01023 | Alpha-2-macroglobulin                        | 27.48 | 24 | 24 | 52 | 163.2 |
| P06727 | Apolipoprotein A-IV                          | 55.81 | 21 | 21 | 50 | 45.4  |
| P02649 | Apolipoprotein E                             | 54.89 | 14 | 14 | 49 | 36.1  |
| P02765 | Alpha-2-HS-glycoprotein                      | 42.78 | 8  | 8  | 45 | 39.3  |
| P01834 | Ig kappa chain C region                      | 80.19 | 6  | 6  | 45 | 11.6  |
| P27169 | Serum paraoxonase/arylesterase I             | 47.89 | 10 | 10 | 38 | 39.7  |
| P04003 | C4b-binding protein alpha chain              | 32.83 | 13 | 13 | 34 | 67.0  |
| Q9BXR6 | Complement factor H-related protein 5        | 39.72 | 11 | 12 | 31 | 64.4  |
| P02787 | Serotransferrin                              | 32.81 | 15 | 15 | 30 | 77.0  |
| P05546 | Heparin cofactor 2                           | 28.66 | 13 | 13 | 29 | 57.0  |
| K7ER19 | Truncated apolipoprotein C-I (Fragment)      | 31.17 | 5  | 5  | 28 | 8.6   |
| O95445 | Apolipoprotein M                             | 52.13 | 7  | 7  | 24 | 21.2  |
| Q5T985 | Inter-alpha-trypsin inhibitor heavy chain H2 | 19.47 | 10 | 10 | 23 | 105.2 |
| P07996 | Thrombospondin-1                             | 14.96 | 10 | 10 | 22 | 129.3 |
| P04196 | Histidine-rich glycoprotein                  | 20.19 | 8  | 8  | 22 | 59.5  |
| P08697 | Alpha-2-antiplasmin                          | 32.18 | 9  | 9  | 21 | 54.5  |
| P02760 | Protein AMBP                                 | 34.94 | 8  | 8  | 21 | 39.0  |
| P02766 | Transthyretin                                | 68.03 | 7  | 7  | 21 | 15.9  |
| P01876 | Ig alpha-1 chain C region                    | 37.96 | 3  | 7  | 21 | 37.6  |
| P07225 | Vitamin K-dependent protein S                | 16.12 | 7  | 7  | 18 | 75.1  |
| P02774 | Vitamin D-binding protein                    | 24.26 | 6  | 6  | 18 | 52.9  |
| Q03591 | Complement factor H-related protein 1        | 31.82 | 3  | 7  | 18 | 37.6  |
| P00739 | Haptoglobin-related protein                  | 34.77 | 5  | 8  | 17 | 39.0  |
| P02656 | Apolipoprotein C-III                         | 48.48 | 4  | 4  | 17 | 10.8  |
| P05090 | Apolipoprotein D                             | 25.93 | 4  | 4  | 17 | 21.3  |
| F5H7E1 | Uncharacterized protein                      | 18.29 | 8  | 8  | 14 | 72.1  |
| P02749 | Beta-2-glycoprotein 1                        | 33.91 | 7  | 7  | 14 | 38.3  |
| F5GXS5 | Apolipoprotein F                             | 26.95 | 3  | 3  | 14 | 33.4  |
| P01857 | Ig gamma-1 chain C region                    | 29.09 | 3  | 6  | 14 | 36.1  |
| O14791 | Apolipoprotein L1                            | 18.34 | 4  | 4  | 13 | 43.9  |
| P08519 | Apolipoprotein(a)                            | 19.24 | 4  | 4  | 13 | 501.0 |
| P18428 | Lipopolysaccharide-binding protein           | 16.84 | 6  | 6  | 12 | 53.3  |
| P35542 | Serum amyloid A-4 protein                    | 26.92 | 3  | 3  | 12 | 14.7  |
| D6R934 | Complement C1q subcomponent subunit B        | 17.13 | 3  | 3  | 11 | 26.4  |
| P02776 | Platelet factor 4                            | 26.73 | 3  | 3  | 11 | 10.8  |
| P00736 | Complement C1r subcomponent                  | 11.35 | 5  | 5  | 10 | 80.1  |
| P02533 | Keratin, type I cytoskeletal 14              | 16.95 | 5  | 7  | 10 | 51.5  |
| O75636 | Ficolin-3                                    | 24.08 | 4  | 4  | 10 | 32.9  |
| P00747 | Plasminogen                                  | 12.59 | 5  | 5  | 9  | 90.5  |
| O43866 | CD5 antigen-like                             | 21.04 | 4  | 4  | 9  | 38.1  |
| P09871 | Complement C1s subcomponent                  | 10.17 | 4  | 4  | 8  | 76.6  |

|        |                                                 |       |   |   |   |       |
|--------|-------------------------------------------------|-------|---|---|---|-------|
| P12259 | Coagulation factor V                            | 2.65  | 4 | 4 | 8 | 251.5 |
| B4E1H2 | Plasma protease C1 inhibitor                    | 12.95 | 4 | 4 | 8 | 49.7  |
| P02747 | Complement C1q subcomponent subunit C           | 16.33 | 3 | 3 | 8 | 25.8  |
| P04180 | Phosphatidylcholine-sterol acyltransferase      | 17.73 | 4 | 4 | 7 | 49.5  |
| P01019 | Angiotensinogen                                 | 11.34 | 3 | 3 | 7 | 53.1  |
| B7Z8Q5 | Hyaluronan-binding protein 2 50 kDa heavy chain | 15.71 | 3 | 3 | 7 | 31.7  |
| P01031 | Complement C5                                   | 2.92  | 3 | 3 | 6 | 188.2 |
| F8W6P5 | LVV-hemorphin-7 (Fragment)                      | 53.33 | 3 | 3 | 6 | 9.7   |
| Q9UGM5 | Fetuin-B                                        | 19.11 | 3 | 3 | 5 | 42.0  |
| P23142 | Fibulin-1                                       | 7.54  | 3 | 3 | 4 | 77.2  |
| P02748 | Complement component C9                         | 9.12  | 3 | 3 | 4 | 63.1  |

**Table S5.** List of proteins bound to G-rich SNAs after a 60-min incubation in human serum

| Accession | Description                                  | Coverage | # Unique Peptides | # Peptides | # PSMs | MW [kDa] |
|-----------|----------------------------------------------|----------|-------------------|------------|--------|----------|
| P01008    | Antithrombin-III                             | 64.66    | 29                | 29         | 577    | 52.6     |
| P04114    | Apolipoprotein B-100                         | 46.33    | 142               | 142        | 445    | 515.3    |
| P01024    | Complement C3                                | 62.30    | 72                | 72         | 332    | 187.0    |
| P02768    | Serum albumin                                | 74.55    | 42                | 42         | 311    | 69.3     |
| P02647    | Apolipoprotein A-I                           | 73.41    | 30                | 30         | 277    | 30.8     |
| P00734    | Prothrombin                                  | 50.96    | 25                | 25         | 169    | 70.0     |
| K7ER74    | Protein APOC4-APOC2                          | 39.89    | 7                 | 8          | 115    | 20.0     |
| P08603    | Complement factor H                          | 40.94    | 28                | 31         | 85     | 139.0    |
| P13645    | Keratin, type I cytoskeletal 10              | 49.66    | 21                | 22         | 82     | 58.8     |
| P01009    | Alpha-1-antitrypsin                          | 48.33    | 18                | 18         | 80     | 46.7     |
| Q14624    | Inter-alpha-trypsin inhibitor heavy chain H4 | 33.12    | 18                | 18         | 75     | 103.3    |
| P04264    | Keratin, type II cytoskeletal 1              | 43.32    | 17                | 20         | 75     | 66.0     |
| P04004    | Vitronectin                                  | 33.68    | 9                 | 11         | 72     | 54.3     |
| P02652    | Apolipoprotein A-II                          | 72.00    | 7                 | 7          | 68     | 11.2     |
| P0C0L5    | Complement C4-B                              | 23.97    | 3                 | 24         | 64     | 192.6    |
| P10909    | Clusterin                                    | 32.96    | 14                | 14         | 61     | 52.5     |
| P01023    | Alpha-2-macroglobulin                        | 27.95    | 24                | 24         | 56     | 163.2    |
| P01042    | Kininogen-1                                  | 25.62    | 14                | 14         | 56     | 71.9     |
| P02765    | Alpha-2-HS-glycoprotein                      | 44.69    | 9                 | 9          | 53     | 39.3     |
| P06727    | Apolipoprotein A-IV                          | 51.77    | 18                | 18         | 52     | 45.4     |
| P01871    | Ig mu chain C region                         | 32.08    | 3                 | 10         | 46     | 49.3     |
| P02649    | Apolipoprotein E                             | 55.52    | 14                | 14         | 43     | 36.1     |
| P05546    | Heparin cofactor 2                           | 53.31    | 18                | 18         | 41     | 57.0     |
| P35527    | Keratin, type I cytoskeletal 9               | 51.85    | 16                | 16         | 39     | 62.0     |
| P35908    | Keratin, type II cytoskeletal 2 epidermal    | 42.72    | 13                | 17         | 39     | 65.4     |

|        |                                              |       |    |    |    |       |
|--------|----------------------------------------------|-------|----|----|----|-------|
| P01834 | Ig kappa chain C region                      | 80.19 | 6  | 6  | 38 | 11.6  |
| P27169 | Serum paraoxonase/arylesterase 1             | 45.35 | 9  | 9  | 36 | 39.7  |
| Q5T985 | Inter-alpha-trypsin inhibitor heavy chain H2 | 25.78 | 13 | 13 | 35 | 105.2 |
| K7ER19 | Truncated apolipoprotein C-I (Fragment)      | 31.17 | 5  | 5  | 32 | 8.6   |
| P04003 | C4b-binding protein alpha chain              | 36.35 | 13 | 13 | 31 | 67.0  |
| P08779 | Keratin, type I cytoskeletal 16              | 39.75 | 8  | 14 | 31 | 51.2  |
| P02787 | Serotransferrin                              | 30.23 | 14 | 14 | 30 | 77.0  |
| F5H7E1 | Uncharacterized protein                      | 19.84 | 9  | 9  | 29 | 72.1  |
| O95445 | Apolipoprotein M                             | 52.13 | 7  | 7  | 29 | 21.2  |
| P02538 | Keratin, type II cytoskeletal 6A             | 25.18 | 6  | 10 | 27 | 60.0  |
| P02766 | Transthyretin                                | 68.71 | 8  | 8  | 26 | 15.9  |
| P02533 | Keratin, type I cytoskeletal 14              | 26.69 | 5  | 11 | 25 | 51.5  |
| P08697 | Alpha-2-antiplasmin                          | 34.22 | 8  | 8  | 23 | 54.5  |
| Q9BXR6 | Complement factor H-related protein 5        | 25.48 | 7  | 8  | 23 | 64.4  |
| P01857 | Ig gamma-1 chain C region                    | 33.94 | 3  | 7  | 23 | 36.1  |
| P06396 | Gelsolin                                     | 23.27 | 9  | 9  | 22 | 85.6  |
| P07225 | Vitamin K-dependent protein S                | 18.93 | 8  | 8  | 22 | 75.1  |
| P02656 | Apolipoprotein C-III                         | 48.48 | 4  | 4  | 22 | 10.8  |
| P02760 | Protein AMBP                                 | 34.94 | 9  | 9  | 21 | 39.0  |
| O14791 | Apolipoprotein L1                            | 27.39 | 6  | 6  | 21 | 43.9  |
| P00739 | Haptoglobin-related protein                  | 41.95 | 6  | 8  | 19 | 39.0  |
| P01876 | Ig alpha-1 chain C region                    | 38.81 | 3  | 8  | 18 | 37.6  |
| P02749 | Beta-2-glycoprotein 1                        | 33.91 | 7  | 7  | 16 | 38.3  |
| P18428 | Lipopolysaccharide-binding protein           | 26.61 | 7  | 7  | 16 | 53.3  |
| P04196 | Histidine-rich glycoprotein                  | 16.38 | 6  | 6  | 16 | 59.5  |
| P02774 | Vitamin D-binding protein                    | 19.62 | 5  | 5  | 16 | 52.9  |
| P08519 | Apolipoprotein(a)                            | 26.01 | 5  | 5  | 16 | 501.0 |
| P00747 | Plasminogen                                  | 20.49 | 8  | 8  | 15 | 90.5  |
| Q04695 | Keratin, type I cytoskeletal 17              | 14.81 | 3  | 7  | 15 | 48.1  |
| P05090 | Apolipoprotein D                             | 23.28 | 4  | 4  | 14 | 21.3  |
| F5GXS5 | Apolipoprotein F                             | 26.95 | 3  | 3  | 14 | 33.4  |
| P01860 | Ig gamma-3 chain C region                    | 23.61 | 3  | 6  | 14 | 41.3  |
| B4E1H2 | Plasma protease C1 inhibitor                 | 15.40 | 5  | 5  | 13 | 49.7  |
| P35542 | Serum amyloid A-4 protein                    | 26.92 | 3  | 3  | 12 | 14.7  |
| P55056 | Apolipoprotein C-IV                          | 33.86 | 3  | 4  | 12 | 14.5  |
| P01019 | Angiotensinogen                              | 11.34 | 3  | 3  | 11 | 53.1  |
| J3QLC9 | Haptoglobin (Fragment)                       | 19.45 | 3  | 5  | 11 | 40.8  |
| P12259 | Coagulation factor V                         | 3.46  | 6  | 6  | 10 | 251.5 |
| P07996 | Thrombospondin-1                             | 8.21  | 6  | 6  | 10 | 129.3 |
| P04180 | Phosphatidylcholine-sterol acyltransferase   | 19.32 | 5  | 5  | 10 | 49.5  |
| P00736 | Complement C1r subcomponent                  | 11.35 | 5  | 5  | 10 | 80.1  |
| P02748 | Complement component C9                      | 15.56 | 6  | 6  | 8  | 63.1  |
| P09871 | Complement C1s subcomponent                  | 12.65 | 5  | 5  | 7  | 76.6  |



|        |                                                 |       |   |   |   |      |
|--------|-------------------------------------------------|-------|---|---|---|------|
| O43866 | CD5 antigen-like                                | 17.00 | 3 | 3 | 6 | 38.1 |
| P02747 | Complement C1q subcomponent subunit C           | 16.33 | 3 | 3 | 6 | 25.8 |
| B7Z8Q5 | Hyaluronan-binding protein 2 50 kDa heavy chain | 15.71 | 3 | 3 | 5 | 31.7 |
| Q9UGM5 | Fetuin-B                                        | 18.59 | 3 | 3 | 5 | 42.0 |
| Q96PD5 | N-acetylmuramoyl-L-alanine amidase              | 11.46 | 3 | 3 | 4 | 62.2 |

**Table S6.** List of proteins bound to G-rich SNAs after a 90-min incubation in human serum

| Accession | Description                                  | Coverage | # Unique Peptides | # Peptides | # PSMs | MW [kDa] |
|-----------|----------------------------------------------|----------|-------------------|------------|--------|----------|
| P01008    | Antithrombin-III                             | 65.09    | 30                | 30         | 670    | 52.6     |
| P02647    | Apolipoprotein A-I                           | 78.28    | 29                | 29         | 480    | 30.8     |
| P04114    | Apolipoprotein B-100                         | 43.79    | 146               | 146        | 440    | 515.3    |
| P01024    | Complement C3                                | 62.78    | 81                | 81         | 338    | 187.0    |
| P02768    | Serum albumin                                | 73.73    | 45                | 45         | 259    | 69.3     |
| P00734    | Prothrombin                                  | 50.96    | 26                | 26         | 205    | 70.0     |
| K7ER74    | Protein APOC4-APOC2                          | 39.89    | 7                 | 9          | 119    | 20.0     |
| P08603    | Complement factor H                          | 45.74    | 36                | 39         | 118    | 139.0    |
| P04004    | Vitronectin                                  | 32.43    | 10                | 12         | 94     | 54.3     |
| P02652    | Apolipoprotein A-II                          | 69.00    | 8                 | 8          | 90     | 11.2     |
| P10909    | Clusterin                                    | 38.08    | 18                | 18         | 84     | 52.5     |
| P01009    | Alpha-1-antitrypsin                          | 57.42    | 21                | 21         | 80     | 46.7     |
| F5GXS0    | Complement C4-B                              | 24.68    | 29                | 29         | 79     | 187.6    |
| P06727    | Apolipoprotein A-IV                          | 65.40    | 26                | 26         | 77     | 45.4     |
| P01042    | Kininogen-1                                  | 31.21    | 19                | 19         | 74     | 71.9     |
| Q14624    | Inter-alpha-trypsin inhibitor heavy chain H4 | 32.26    | 20                | 20         | 71     | 103.3    |
| P13645    | Keratin, type I cytoskeletal 10              | 45.03    | 20                | 22         | 70     | 58.8     |
| P01871    | Ig mu chain C region                         | 38.50    | 14                | 14         | 70     | 49.3     |
| P01023    | Alpha-2-macroglobulin                        | 29.10    | 27                | 27         | 67     | 163.2    |
| P02649    | Apolipoprotein E                             | 58.99    | 17                | 17         | 66     | 36.1     |
| P02787    | Serotransferrin                              | 46.99    | 27                | 27         | 62     | 77.0     |
| P02765    | Alpha-2-HS-glycoprotein                      | 45.50    | 10                | 10         | 60     | 39.3     |
| P04264    | Keratin, type II cytoskeletal 1              | 44.57    | 22                | 25         | 56     | 66.0     |
| K7ER19    | Truncated apolipoprotein C-I (Fragment)      | 37.66    | 5                 | 5          | 55     | 8.6      |
| P01834    | Ig kappa chain C region                      | 80.19    | 6                 | 6          | 45     | 11.6     |
| Q5T985    | Inter-alpha-trypsin inhibitor heavy chain H2 | 28.56    | 17                | 17         | 43     | 105.2    |
| P04003    | C4b-binding protein alpha chain              | 32.83    | 13                | 13         | 43     | 67.0     |
| P35527    | Keratin, type I cytoskeletal 9               | 46.23    | 15                | 15         | 39     | 62.0     |
| Q9BXR6    | Complement factor H-related protein 5        | 39.72    | 13                | 14         | 39     | 64.4     |
| P02760    | Protein AMBP                                 | 40.63    | 11                | 11         | 39     | 39.0     |
| P05546    | Heparin cofactor 2                           | 33.47    | 14                | 14         | 38     | 57.0     |

|        |                                            |       |    |    |    |       |
|--------|--------------------------------------------|-------|----|----|----|-------|
| P27169 | Serum paraoxonase/arylesterase I           | 45.35 | 9  | 9  | 35 | 39.7  |
| P04196 | Histidine-rich glycoprotein                | 24.00 | 11 | 11 | 33 | 59.5  |
| P02656 | Apolipoprotein C-III                       | 55.56 | 6  | 6  | 32 | 10.8  |
| P07225 | Vitamin K-dependent protein S              | 29.44 | 15 | 15 | 29 | 75.1  |
| P06396 | Gelsolin                                   | 21.99 | 10 | 10 | 28 | 85.6  |
| P05090 | Apolipoprotein D                           | 29.63 | 6  | 6  | 28 | 21.3  |
| P00738 | Haptoglobin                                | 36.21 | 5  | 11 | 27 | 45.2  |
| P35908 | Keratin, type II cytoskeletal 2 epidermal  | 37.56 | 11 | 14 | 26 | 65.4  |
| O95445 | Apolipoprotein M                           | 60.64 | 8  | 8  | 25 | 21.2  |
| P07996 | Thrombospondin-1                           | 16.67 | 12 | 12 | 23 | 129.3 |
| P02766 | Transthyretin                              | 53.06 | 7  | 7  | 23 | 15.9  |
| Q03591 | Complement factor H-related protein 1      | 38.79 | 5  | 9  | 23 | 37.6  |
| P00739 | Haptoglobin-related protein                | 40.80 | 5  | 11 | 23 | 39.0  |
| P00736 | Complement C1r subcomponent                | 19.72 | 10 | 10 | 22 | 80.1  |
| P00747 | Plasminogen                                | 21.11 | 10 | 10 | 22 | 90.5  |
| P01876 | Ig alpha-1 chain C region                  | 47.31 | 4  | 9  | 22 | 37.6  |
| O14791 | Apolipoprotein L1                          | 41.21 | 8  | 8  | 21 | 43.9  |
| F5H7E1 | Uncharacterized protein                    | 17.21 | 8  | 8  | 21 | 72.1  |
| P01857 | Ig gamma-1 chain C region                  | 41.82 | 4  | 8  | 21 | 36.1  |
| P55056 | Apolipoprotein C-IV                        | 33.86 | 3  | 5  | 21 | 14.5  |
| B4E1H2 | Plasma protease C1 inhibitor               | 24.11 | 10 | 10 | 20 | 49.7  |
| P08697 | Alpha-2-antiplasmin                        | 31.57 | 9  | 9  | 20 | 54.5  |
| P02749 | Beta-2-glycoprotein 1                      | 37.97 | 8  | 8  | 20 | 38.3  |
| P02774 | Vitamin D-binding protein                  | 24.26 | 6  | 6  | 20 | 52.9  |
| P08519 | Apolipoprotein(a)                          | 36.59 | 8  | 8  | 18 | 501.0 |
| P01031 | Complement C5                              | 6.92  | 8  | 8  | 15 | 188.2 |
| O43866 | CD5 antigen-like                           | 29.39 | 7  | 7  | 14 | 38.1  |
| P09871 | Complement C1s subcomponent                | 21.22 | 8  | 8  | 13 | 76.6  |
| D6R934 | Complement C1q subcomponent subunit B      | 17.13 | 3  | 3  | 13 | 26.4  |
| P02790 | Hemopexin                                  | 24.68 | 6  | 6  | 12 | 51.6  |
| P02748 | Complement component C9                    | 12.70 | 5  | 5  | 12 | 63.1  |
| P02776 | Platelet factor 4                          | 26.73 | 3  | 3  | 12 | 10.8  |
| P35542 | Serum amyloid A-4 protein                  | 26.92 | 3  | 3  | 12 | 14.7  |
| F5GXS5 | Apolipoprotein F                           | 26.95 | 3  | 3  | 12 | 33.4  |
| P0DJI8 | Serum amyloid A-1 protein                  | 66.39 | 6  | 6  | 11 | 13.5  |
| P12259 | Coagulation factor V                       | 2.65  | 5  | 5  | 11 | 251.5 |
| P19652 | Alpha-1-acid glycoprotein 2                | 21.89 | 3  | 4  | 11 | 23.6  |
| P04180 | Phosphatidylcholine-sterol acyltransferase | 22.50 | 5  | 5  | 10 | 49.5  |
| P48740 | Mannan-binding lectin serine protease 1    | 9.44  | 5  | 5  | 10 | 79.2  |
| Q96PD5 | N-acetylmuramoyl-L-alanine amidase         | 13.72 | 4  | 4  | 10 | 62.2  |
| P01019 | Angiotensinogen                            | 17.32 | 5  | 5  | 9  | 53.1  |
| P68871 | Hemoglobin subunit beta                    | 52.38 | 5  | 5  | 9  | 16.0  |
| D6REX5 | Selenoprotein P (Fragment)                 | 17.10 | 4  | 4  | 9  | 35.1  |
| F8W7G7 | Ugl-Y3                                     | 3.62  | 5  | 5  | 8  | 243.1 |

|        |                                          |       |   |   |   |      |
|--------|------------------------------------------|-------|---|---|---|------|
| Q14520 | Hyaluronan-binding protein 2             | 9.64  | 4 | 4 | 8 | 62.6 |
| H7C5R1 | Ceruloplasmin (Fragment)                 | 8.45  | 4 | 4 | 8 | 97.7 |
| P02747 | Complement C1q subcomponent subunit C    | 16.33 | 3 | 3 | 8 | 25.8 |
| Q16610 | Extracellular matrix protein 1           | 10.00 | 4 | 4 | 7 | 60.6 |
| P03952 | Plasma kallikrein                        | 9.56  | 4 | 4 | 7 | 71.3 |
| G3XAM2 | Complement factor I light chain          | 8.33  | 3 | 3 | 7 | 65.0 |
| D6RD17 | Immunoglobulin J chain (Fragment)        | 28.66 | 4 | 4 | 6 | 18.0 |
| B1AHL4 | Fibulin-1                                | 11.98 | 4 | 4 | 6 | 65.4 |
| P18428 | Lipopolysaccharide-binding protein       | 9.77  | 3 | 3 | 6 | 53.3 |
| P04217 | Alpha-1B-glycoprotein                    | 10.30 | 3 | 3 | 4 | 54.2 |
| E7EUT5 | Glyceraldehyde-3-phosphate dehydrogenase | 16.54 | 3 | 3 | 4 | 27.9 |

**Table S7.** List of proteins bound to poly-T SNAs after a 15-min incubation in human serum

| Accession | Description                                  | Coverage | # Unique Peptides | # Peptides | # PSMs | MW [kDa] |
|-----------|----------------------------------------------|----------|-------------------|------------|--------|----------|
| P02768    | Serum albumin                                | 74.88    | 43                | 43         | 294    | 69.3     |
| P04264    | Keratin, type II cytoskeletal 1              | 56.52    | 31                | 35         | 288    | 66.0     |
| P04114    | Apolipoprotein B-100                         | 34.30    | 98                | 98         | 241    | 515.3    |
| P35527    | Keratin, type I cytoskeletal 9               | 66.29    | 33                | 34         | 212    | 62.0     |
| P01024    | Complement C3                                | 48.71    | 52                | 52         | 196    | 187.0    |
| P13645    | Keratin, type I cytoskeletal 10              | 59.42    | 29                | 32         | 174    | 58.8     |
| P01008    | Antithrombin-III                             | 40.95    | 15                | 15         | 173    | 52.6     |
| P02647    | Apolipoprotein A-I                           | 71.91    | 28                | 28         | 150    | 30.8     |
| P08603    | Complement factor H                          | 49.63    | 40                | 43         | 127    | 139.0    |
| P35908    | Keratin, type II cytoskeletal 2 epidermal    | 59.00    | 21                | 29         | 78     | 65.4     |
| P02655    | Apolipoprotein C-II                          | 52.48    | 5                 | 5          | 66     | 11.3     |
| P01871    | Ig mu chain C region                         | 33.85    | 11                | 11         | 57     | 49.3     |
| P02652    | Apolipoprotein A-II                          | 67.00    | 6                 | 6          | 53     | 11.2     |
| P01009    | Alpha-1-antitrypsin                          | 44.74    | 15                | 15         | 50     | 46.7     |
| Q14624    | Inter-alpha-trypsin inhibitor heavy chain H4 | 27.63    | 13                | 13         | 46     | 103.3    |
| P01023    | Alpha-2-macroglobulin                        | 22.93    | 21                | 21         | 45     | 163.2    |
| P08779    | Keratin, type I cytoskeletal 16              | 42.49    | 7                 | 16         | 45     | 51.2     |
| P01834    | Ig kappa chain C region                      | 80.19    | 6                 | 6          | 44     | 11.6     |
| P02533    | Keratin, type I cytoskeletal 14              | 40.47    | 6                 | 15         | 42     | 51.5     |
| P02765    | Alpha-2-HS-glycoprotein                      | 44.69    | 9                 | 9          | 41     | 39.3     |
| P02787    | Serotransferrin                              | 41.40    | 20                | 20         | 40     | 77.0     |
| P02649    | Apolipoprotein E                             | 53.63    | 15                | 15         | 38     | 36.1     |
| P06727    | Apolipoprotein A-IV                          | 45.71    | 15                | 15         | 37     | 45.4     |
| P10909    | Clusterin                                    | 30.96    | 12                | 12         | 37     | 52.5     |
| P04004    | Vitronectin                                  | 20.29    | 7                 | 7          | 37     | 54.3     |
| P00734    | Prothrombin                                  | 37.30    | 15                | 15         | 36     | 70.0     |

|        |                                              |       |    |    |    |       |
|--------|----------------------------------------------|-------|----|----|----|-------|
| P13647 | Keratin, type II cytoskeletal 5              | 30.34 | 8  | 15 | 35 | 62.3  |
| P0C0L5 | Complement C4-B                              | 15.19 | 14 | 14 | 32 | 192.6 |
| P01042 | Kininogen-1                                  | 21.27 | 12 | 12 | 32 | 71.9  |
| P04259 | Keratin, type II cytoskeletal 6B             | 22.34 | 3  | 12 | 32 | 60.0  |
| P01857 | Ig gamma-1 chain C region                    | 37.58 | 5  | 8  | 23 | 36.1  |
| K7ER19 | Truncated apolipoprotein C-I (Fragment)      | 31.17 | 4  | 4  | 21 | 8.6   |
| Q08380 | Galectin-3-binding protein                   | 17.78 | 6  | 6  | 17 | 65.3  |
| Q03591 | Complement factor H-related protein 1        | 41.52 | 4  | 7  | 17 | 37.6  |
| P01876 | Ig alpha-1 chain C region                    | 47.31 | 4  | 9  | 17 | 37.6  |
| P04003 | C4b-binding protein alpha chain              | 20.60 | 8  | 8  | 16 | 67.0  |
| P00739 | Haptoglobin-related protein                  | 45.40 | 6  | 9  | 16 | 39.0  |
| P02766 | Transferrin                                  | 59.18 | 6  | 6  | 16 | 15.9  |
| O14791 | Apolipoprotein L1                            | 25.38 | 5  | 5  | 16 | 43.9  |
| P27169 | Serum paraoxonase/arylesterase 1             | 23.94 | 5  | 5  | 16 | 39.7  |
| J3QLC9 | Haptoglobin (Fragment)                       | 31.23 | 4  | 7  | 15 | 40.8  |
| Q5T749 | Keratinocyte proline-rich protein            | 22.11 | 6  | 6  | 12 | 64.1  |
| O95445 | Apolipoprotein M                             | 39.89 | 5  | 5  | 12 | 21.2  |
| P02774 | Vitamin D-binding protein                    | 12.45 | 3  | 3  | 12 | 52.9  |
| D6R934 | Complement C1q subcomponent subunit B        | 21.12 | 3  | 3  | 12 | 26.4  |
| P08519 | Apolipoprotein(a)                            | 18.84 | 3  | 3  | 11 | 501.0 |
| P14923 | Junction plakoglobin                         | 8.72  | 4  | 4  | 10 | 81.7  |
| P02656 | Apolipoprotein C-III                         | 46.46 | 3  | 3  | 10 | 10.8  |
| P07225 | Vitamin K-dependent protein S                | 12.28 | 5  | 5  | 9  | 75.1  |
| F5H7E1 | Uncharacterized protein                      | 8.37  | 4  | 4  | 9  | 72.1  |
| P35542 | Serum amyloid A-4 protein                    | 24.62 | 3  | 3  | 9  | 14.7  |
| Q5T985 | Inter-alpha-trypsin inhibitor heavy chain H2 | 13.48 | 6  | 6  | 8  | 105.2 |
| P09871 | Complement C1s subcomponent                  | 10.47 | 4  | 4  | 8  | 76.6  |
| P81605 | Dermcidin                                    | 22.73 | 3  | 3  | 8  | 11.3  |
| P02760 | Protein AMBP                                 | 16.76 | 4  | 4  | 7  | 39.0  |
| O43866 | CD5 antigen-like                             | 20.17 | 4  | 4  | 7  | 38.1  |
| P05090 | Apolipoprotein D                             | 20.11 | 3  | 3  | 7  | 21.3  |
| P04196 | Histidine-rich glycoprotein                  | 8.00  | 3  | 3  | 6  | 59.5  |
| P08697 | Alpha-2-antiplasmin                          | 14.26 | 3  | 3  | 4  | 54.5  |
| P02749 | Beta-2-glycoprotein 1                        | 15.36 | 3  | 3  | 4  | 38.3  |
| P05546 | Heparin cofactor 2                           | 10.22 | 3  | 3  | 3  | 57.0  |
| P04180 | Phosphatidylcholine-sterol acyltransferase   | 12.05 | 3  | 3  | 3  | 49.5  |

**Table S8.** List of proteins bound to poly-T SNAs after a 30-min incubation in human serum

| Accession | Description        | Coverage | # Unique Peptides | # Peptides | # PSMs | MW [kDa] |
|-----------|--------------------|----------|-------------------|------------|--------|----------|
| P02768    | Serum albumin      | 74.22    | 44                | 44         | 338    | 69.3     |
| P02647    | Apolipoprotein A-I | 80.15    | 29                | 29         | 140    | 30.8     |

|        |                                                     |       |    |    |     |       |
|--------|-----------------------------------------------------|-------|----|----|-----|-------|
| P01008 | Antithrombin-III                                    | 51.29 | 17 | 17 | 112 | 52.6  |
| P04114 | Apolipoprotein B-100                                | 20.03 | 51 | 51 | 111 | 515.3 |
| P08603 | Complement factor H                                 | 42.65 | 33 | 36 | 95  | 139.0 |
| P01024 | Complement C3                                       | 34.46 | 34 | 34 | 89  | 187.0 |
| P02787 | Serotransferrin                                     | 45.99 | 24 | 24 | 60  | 77.0  |
| P13645 | Keratin, type I cytoskeletal 10                     | 39.55 | 16 | 17 | 57  | 58.8  |
| P04264 | Keratin, type II cytoskeletal 1                     | 44.41 | 19 | 21 | 53  | 66.0  |
| P01009 | Alpha-1-antitrypsin                                 | 39.00 | 14 | 14 | 45  | 46.7  |
| P02652 | Apolipoprotein A-II                                 | 59.00 | 6  | 6  | 39  | 11.2  |
| P35527 | Keratin, type I cytoskeletal 9                      | 48.64 | 14 | 14 | 35  | 62.0  |
| P01023 | Alpha-2-macroglobulin                               | 20.90 | 18 | 18 | 34  | 163.2 |
| P02649 | Apolipoprotein E                                    | 43.85 | 12 | 12 | 33  | 36.1  |
| P02655 | Apolipoprotein C-II                                 | 52.48 | 5  | 5  | 32  | 11.3  |
| P35908 | Keratin, type II cytoskeletal 2 epidermal           | 43.35 | 13 | 15 | 31  | 65.4  |
| P06727 | Apolipoprotein A-IV                                 | 43.69 | 13 | 13 | 31  | 45.4  |
| P10909 | Clusterin                                           | 28.73 | 10 | 10 | 31  | 52.5  |
| P01834 | Ig kappa chain C region                             | 80.19 | 6  | 6  | 26  | 11.6  |
| P00734 | Prothrombin                                         | 29.74 | 12 | 12 | 25  | 70.0  |
| P0CG05 | Ig lambda-2 chain C regions                         | 65.09 | 4  | 4  | 24  | 11.3  |
| P04004 | Vitronectin                                         | 14.23 | 5  | 5  | 22  | 54.3  |
| J3QLC9 | Haptoglobin (Fragment)                              | 34.79 | 5  | 8  | 22  | 40.8  |
| F5GXS0 | Complement C4-B                                     | 11.19 | 9  | 9  | 20  | 187.6 |
| P01042 | Kininogen-1                                         | 16.61 | 8  | 8  | 20  | 71.9  |
| P02765 | Alpha-2-HS-glycoprotein                             | 40.87 | 7  | 7  | 20  | 39.3  |
| F5GXQ1 | 35 kDa inter-alpha-trypsin inhibitor heavy chain H4 | 14.29 | 4  | 4  | 20  | 62.1  |
| K7ER19 | Truncated apolipoprotein C-I (Fragment)             | 31.17 | 5  | 5  | 17  | 8.6   |
| P02766 | Transthyretin                                       | 68.71 | 7  | 7  | 16  | 15.9  |
| P27169 | Serum paraoxonase/arylesterase 1                    | 25.63 | 5  | 5  | 16  | 39.7  |
| P02774 | Vitamin D-binding protein                           | 19.62 | 5  | 5  | 14  | 52.9  |
| O14791 | Apolipoprotein L1                                   | 19.35 | 4  | 4  | 14  | 43.9  |
| Q08380 | Galectin-3-binding protein                          | 17.09 | 6  | 6  | 13  | 65.3  |
| P00739 | Haptoglobin-related protein                         | 28.45 | 3  | 6  | 13  | 39.0  |
| Q03591 | Complement factor H-related protein 1               | 33.64 | 3  | 6  | 13  | 37.6  |
| P02656 | Apolipoprotein C-III                                | 46.46 | 3  | 3  | 12  | 10.8  |
| P08519 | Apolipoprotein(a)                                   | 18.84 | 3  | 3  | 10  | 501.0 |
| P01876 | Ig alpha-1 chain C region                           | 21.81 | 3  | 5  | 10  | 37.6  |
| P04003 | C4b-binding protein alpha chain                     | 10.22 | 4  | 4  | 9   | 67.0  |
| O95445 | Apolipoprotein M                                    | 22.34 | 3  | 3  | 9   | 21.2  |
| P08697 | Alpha-2-antiplasmin                                 | 13.85 | 3  | 3  | 8   | 54.5  |
| B4E1H2 | Plasma protease C1 inhibitor                        | 11.16 | 3  | 3  | 8   | 49.7  |
| P01857 | Ig gamma-1 chain C region                           | 14.85 | 3  | 3  | 7   | 36.1  |
| P02790 | Hemopexin                                           | 19.91 | 5  | 5  | 6   | 51.6  |
| P07225 | Vitamin K-dependent protein S                       | 9.47  | 3  | 3  | 6   | 75.1  |
| D6RD17 | Immunoglobulin J chain (Fragment)                   | 23.57 | 3  | 3  | 6   | 18.0  |

**Table S9.** List of proteins bound to poly-T SNAs after a 60-min incubation in human serum

| Accession | Description                                         | Coverage | # Unique Peptides | # Peptides | # PSMs | MW [kDa] |
|-----------|-----------------------------------------------------|----------|-------------------|------------|--------|----------|
| P02768    | Serum albumin                                       | 71.26    | 39                | 39         | 276    | 69.3     |
| P02647    | Apolipoprotein A-I                                  | 79.40    | 34                | 34         | 256    | 30.8     |
| P04114    | Apolipoprotein B-100                                | 20.40    | 50                | 50         | 124    | 515.3    |
| P01024    | Complement C3                                       | 33.97    | 34                | 34         | 103    | 187.0    |
| P01008    | Antithrombin-III                                    | 52.59    | 18                | 18         | 98     | 52.6     |
| P02655    | Apolipoprotein C-II                                 | 54.46    | 7                 | 7          | 79     | 11.3     |
| P13645    | Keratin, type I cytoskeletal 10                     | 36.13    | 15                | 16         | 73     | 58.8     |
| P02652    | Apolipoprotein A-II                                 | 59.00    | 6                 | 6          | 69     | 11.2     |
| P08603    | Complement factor H                                 | 35.50    | 25                | 27         | 66     | 139.0    |
| P04264    | Keratin, type II cytoskeletal 1                     | 38.04    | 16                | 20         | 60     | 66.0     |
| P01009    | Alpha-1-antitrypsin                                 | 42.58    | 15                | 15         | 48     | 46.7     |
| P02649    | Apolipoprotein E                                    | 53.63    | 15                | 15         | 43     | 36.1     |
| P35527    | Keratin, type I cytoskeletal 9                      | 48.80    | 16                | 16         | 41     | 62.0     |
| P35908    | Keratin, type II cytoskeletal 2 epidermal           | 44.91    | 13                | 17         | 41     | 65.4     |
| P02787    | Serotransferrin                                     | 30.80    | 15                | 15         | 39     | 77.0     |
| P02765    | Alpha-2-HS-glycoprotein                             | 42.78    | 8                 | 8          | 38     | 39.3     |
| P01023    | Alpha-2-macroglobulin                               | 17.03    | 14                | 14         | 31     | 163.2    |
| P00734    | Prothrombin                                         | 29.42    | 12                | 12         | 29     | 70.0     |
| P06727    | Apolipoprotein A-IV                                 | 38.89    | 12                | 12         | 29     | 45.4     |
| P10909    | Clusterin                                           | 24.72    | 8                 | 8          | 29     | 52.5     |
| P0CG05    | Ig lambda-2 chain C regions                         | 65.09    | 4                 | 4          | 29     | 11.3     |
| F5GXQ1    | 35 kDa inter-alpha-trypsin inhibitor heavy chain H4 | 14.29    | 4                 | 4          | 25     | 62.1     |
| F5GXS5    | Apolipoprotein F                                    | 26.95    | 3                 | 3          | 24     | 33.4     |
| K7ER19    | Truncated apolipoprotein C-I (Fragment)             | 42.86    | 6                 | 6          | 23     | 8.6      |
| P01042    | Kininogen-1                                         | 18.01    | 10                | 10         | 22     | 71.9     |
| P02766    | Transthyretin                                       | 68.71    | 8                 | 8          | 21     | 15.9     |
| P01834    | Ig kappa chain C region                             | 63.21    | 4                 | 4          | 21     | 11.6     |
| P0COL5    | Complement C4-B                                     | 11.35    | 9                 | 9          | 19     | 192.6    |
| P04004    | Vitronectin                                         | 14.23    | 4                 | 4          | 19     | 54.3     |

|        |                                              |       |   |   |    |       |
|--------|----------------------------------------------|-------|---|---|----|-------|
| P00739 | Haptoglobin-related protein                  | 41.95 | 6 | 8 | 18 | 39.0  |
| Q08380 | Galectin-3-binding protein                   | 20.51 | 7 | 7 | 16 | 65.3  |
| P02656 | Apolipoprotein C-III                         | 58.59 | 6 | 6 | 16 | 10.8  |
| P27169 | Serum paraoxonase/arylesterase 1             | 25.63 | 5 | 5 | 16 | 39.7  |
| O95445 | Apolipoprotein M                             | 45.21 | 5 | 5 | 16 | 21.2  |
| P08779 | Keratin, type I cytoskeletal 16              | 16.70 | 3 | 5 | 14 | 51.2  |
| O14791 | Apolipoprotein L1                            | 22.36 | 3 | 3 | 13 | 43.9  |
| P35542 | Serum amyloid A-4 protein                    | 44.62 | 4 | 4 | 11 | 14.7  |
| P08697 | Alpha-2-antiplasmin                          | 19.14 | 4 | 4 | 10 | 54.5  |
| P01876 | Ig alpha-1 chain C region                    | 24.93 | 5 | 5 | 9  | 37.6  |
| P08519 | Apolipoprotein(a)                            | 18.84 | 3 | 3 | 9  | 501.0 |
| O43866 | CD5 antigen-like                             | 17.00 | 3 | 3 | 9  | 38.1  |
| P04003 | C4b-binding protein alpha chain              | 11.06 | 4 | 4 | 7  | 67.0  |
| P05090 | Apolipoprotein D                             | 19.58 | 3 | 3 | 7  | 21.3  |
| P68871 | Hemoglobin subunit beta                      | 34.69 | 3 | 3 | 7  | 16.0  |
| P02749 | Beta-2-glycoprotein 1                        | 22.90 | 4 | 4 | 6  | 38.3  |
| Q5T985 | Inter-alpha-trypsin inhibitor heavy chain H2 | 9.09  | 4 | 4 | 6  | 105.2 |
| D6RD17 | Immunoglobulin J chain (Fragment)            | 38.85 | 3 | 3 | 6  | 18.0  |
| P02760 | Protein AMBP                                 | 12.50 | 3 | 3 | 5  | 39.0  |
| B4E1H2 | Plasma protease C1 inhibitor                 | 9.38  | 3 | 3 | 5  | 49.7  |
| F8WCZ6 | Complement C1s subcomponent                  | 12.67 | 3 | 3 | 4  | 57.5  |

**Table S10.** List of proteins bound to poly-T SNAs after a 90-min incubation in human serum

| Accession | Description                                  | Coverage | # Proteins | # Unique Peptides | # Peptides | # PSMs | MW [kDa] |
|-----------|----------------------------------------------|----------|------------|-------------------|------------|--------|----------|
| P02647    | Apolipoprotein A-I                           | 78.65    | 2          | 33                | 33         | 312    | 30.8     |
| P02768    | Serum albumin                                | 65.19    | 6          | 35                | 35         | 281    | 69.3     |
| P04114    | Apolipoprotein B-100                         | 30.59    | 2          | 85                | 85         | 201    | 515.3    |
| P02655    | Apolipoprotein C-II                          | 54.46    | 4          | 7                 | 7          | 191    | 11.3     |
| P01024    | Complement C3                                | 35.96    | 5          | 36                | 36         | 126    | 187.0    |
| P02652    | Apolipoprotein A-II                          | 74.00    | 6          | 8                 | 8          | 109    | 11.2     |
| P01008    | Antithrombin-III                             | 47.20    | 1          | 16                | 16         | 83     | 52.6     |
| P13645    | Keratin, type I cytoskeletal 10              | 41.61    | 11         | 19                | 19         | 75     | 58.8     |
| P04264    | Keratin, type II cytoskeletal 1              | 35.87    | 10         | 15                | 19         | 65     | 66.0     |
| P08603    | Complement factor H                          | 35.74    | 5          | 23                | 26         | 59     | 139.0    |
| P02765    | Alpha-2-HS-glycoprotein                      | 42.78    | 2          | 8                 | 8          | 58     | 39.3     |
| P01009    | Alpha-1-antitrypsin                          | 42.58    | 5          | 14                | 14         | 47     | 46.7     |
| P02649    | Apolipoprotein E                             | 48.58    | 4          | 13                | 13         | 46     | 36.1     |
| P10909    | Clusterin                                    | 34.30    | 10         | 14                | 14         | 44     | 52.5     |
| Q14624    | Inter-alpha-trypsin inhibitor heavy chain H4 | 28.71    | 4          | 14                | 14         | 41     | 103.3    |
| P06727    | Apolipoprotein A-IV                          | 51.01    | 1          | 14                | 14         | 37     | 45.4     |

|        |                                              |       |    |    |    |    |       |
|--------|----------------------------------------------|-------|----|----|----|----|-------|
| P02787 | Serotransferrin                              | 31.95 | 7  | 15 | 15 | 35 | 77.0  |
| P35908 | Keratin, type II cytoskeletal 2 epidermal    | 43.04 | 10 | 11 | 16 | 35 | 65.4  |
| P01871 | Ig mu chain C region                         | 30.97 | 1  | 3  | 10 | 34 | 49.3  |
| K7ER19 | Truncated apolipoprotein C-I (Fragment)      | 42.86 | 6  | 6  | 6  | 33 | 8.6   |
| P01023 | Alpha-2-macroglobulin                        | 17.10 | 4  | 15 | 15 | 32 | 163.2 |
| P01834 | Ig kappa chain C region                      | 80.19 | 1  | 6  | 6  | 31 | 11.6  |
| P01042 | Kininogen-1                                  | 22.05 | 1  | 12 | 12 | 30 | 71.9  |
| P35527 | Keratin, type I cytoskeletal 9               | 38.36 | 2  | 12 | 12 | 28 | 62.0  |
| F5GXS5 | Apolipoprotein F                             | 26.95 | 2  | 3  | 3  | 28 | 33.4  |
| P00734 | Prothrombin                                  | 29.42 | 3  | 11 | 11 | 25 | 70.0  |
| F5GXS0 | Complement C4-B                              | 10.48 | 3  | 10 | 10 | 24 | 187.6 |
| O14791 | Apolipoprotein L1                            | 35.18 | 4  | 6  | 6  | 23 | 43.9  |
| P02766 | Transthyretin                                | 68.71 | 1  | 8  | 8  | 22 | 15.9  |
| P02656 | Apolipoprotein C-III                         | 58.59 | 2  | 6  | 6  | 21 | 10.8  |
| P04004 | Vitronectin                                  | 12.13 | 1  | 4  | 4  | 19 | 54.3  |
| Q5T985 | Inter-alpha-trypsin inhibitor heavy chain H2 | 20.96 | 3  | 10 | 10 | 17 | 105.2 |
| P27169 | Serum paraoxonase/arylesterase 1             | 25.63 | 3  | 5  | 5  | 17 | 39.7  |
| B4E1H2 | Plasma protease C1 inhibitor                 | 25.67 | 6  | 7  | 7  | 15 | 49.7  |
| P00739 | Haptoglobin-related protein                  | 32.76 | 2  | 5  | 6  | 15 | 39.0  |
| P01876 | Ig alpha-1 chain C region                    | 36.26 | 1  | 4  | 7  | 14 | 37.6  |
| P35542 | Serum amyloid A-4 protein                    | 26.92 | 1  | 3  | 3  | 14 | 14.7  |
| F5H7E1 | Uncharacterized protein                      | 14.88 | 4  | 7  | 7  | 11 | 72.1  |
| P04003 | C4b-binding protein alpha chain              | 17.59 | 2  | 6  | 6  | 11 | 67.0  |
| P02749 | Beta-2-glycoprotein 1                        | 21.74 | 4  | 5  | 5  | 11 | 38.3  |
| P05090 | Apolipoprotein D                             | 26.46 | 4  | 4  | 4  | 11 | 21.3  |
| P01857 | Ig gamma-1 chain C region                    | 29.70 | 3  | 4  | 6  | 11 | 36.1  |
| P08697 | Alpha-2-antiplasmin                          | 25.46 | 3  | 5  | 5  | 10 | 54.5  |
| P07225 | Vitamin K-dependent protein S                | 10.36 | 3  | 4  | 4  | 9  | 75.1  |
| Q08380 | Galectin-3-binding protein                   | 17.78 | 9  | 6  | 6  | 8  | 65.3  |
| P08519 | Apolipoprotein(a)                            | 18.84 | 1  | 3  | 3  | 8  | 501.0 |
| J3QLC9 | Haptoglobin (Fragment)                       | 21.92 | 5  | 3  | 4  | 8  | 40.8  |
| P05546 | Heparin cofactor 2                           | 12.42 | 1  | 4  | 4  | 6  | 57.0  |
| P02760 | Protein AMBP                                 | 12.22 | 2  | 3  | 3  | 6  | 39.0  |
| P68871 | Hemoglobin subunit beta                      | 34.69 | 5  | 3  | 3  | 6  | 16.0  |
| P04180 | Phosphatidylcholine-sterol acyltransferase   | 13.64 | 3  | 3  | 3  | 6  | 49.5  |
| F8WCZ6 | Complement C1s subcomponent                  | 8.83  | 4  | 3  | 3  | 5  | 57.5  |



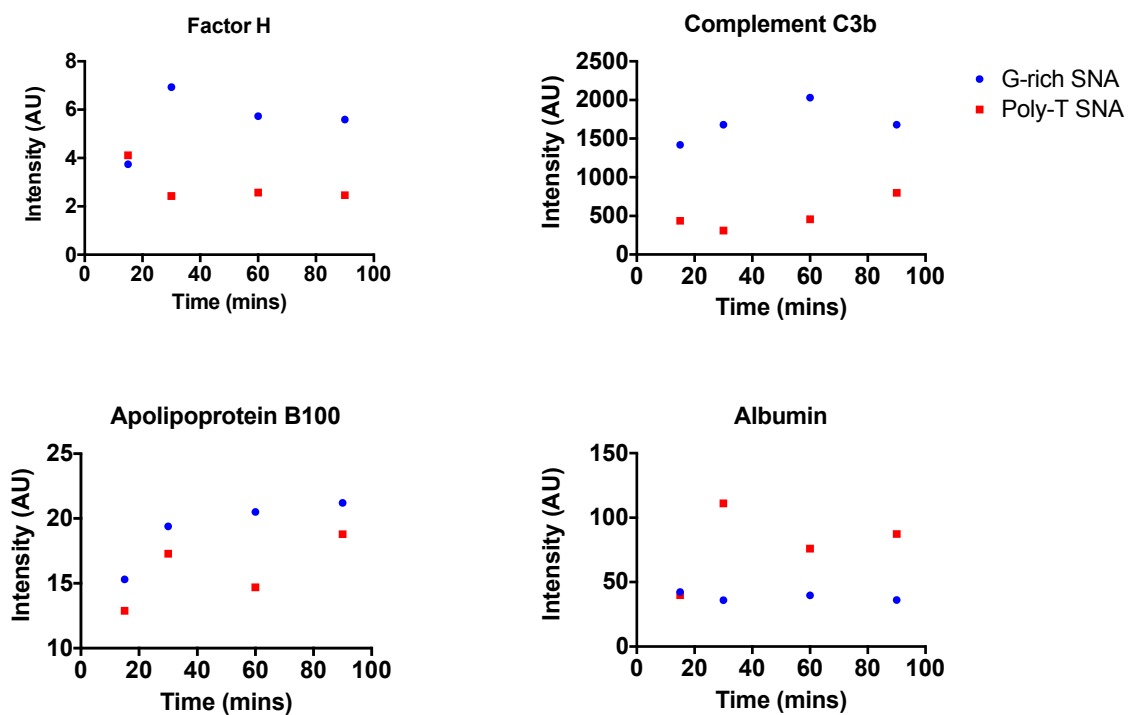

**Figure S2.** Relative quantification of proteins associated with G-rich and poly-T SNAs following incubation in 10% human serum.

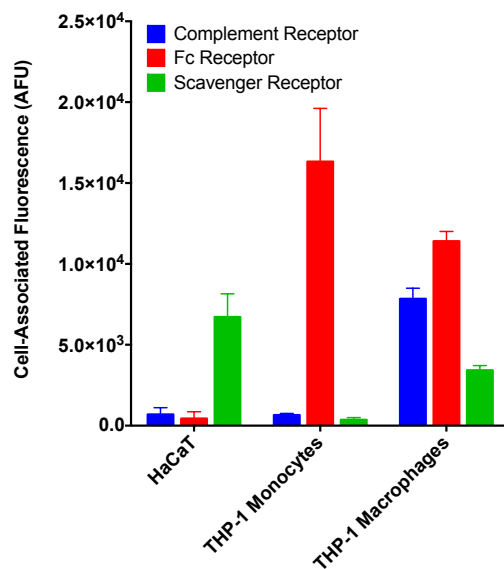

**Figure S3.** Flow cytometry of cells treated with fluorophore-tagged antibodies recognizing class A scavenger receptors, Fc receptors, and complement receptors. The cell-associated fluorescence of THP-1 (monocytes, and differentiated macrophages) and HaCaT cells is shown.

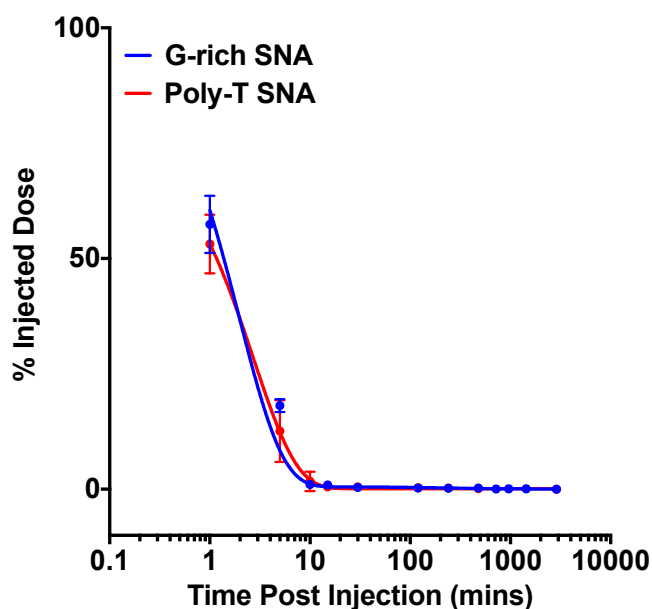

**Figure S4.** Pharmacokinetic analysis of G-rich (blue dots) and poly-T (red dots) SNA content in blood of CD57BL/6 mice following intravenous injection via the tail vein. A line of best fit (plotted as solid lines) was used to determine pharmacokinetic parameters.

**Table S11.** Pharmacokinetic parameters of G-rich and poly-T SNAs.

|                      | G-rich SNAs | Poly-T SNAs |
|----------------------|-------------|-------------|
| $t_{1/2}$ fast (min) | 1.368       | 1.647       |
| $t_{1/2}$ slow (min) | 400.6       | 429.2       |

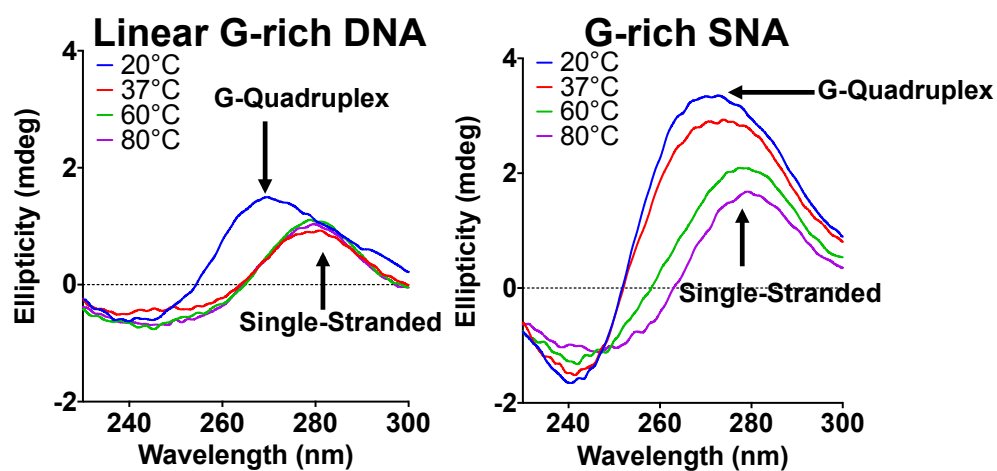**Figure S5.** Circular dichroism spectra of G-rich SNAs and G-rich DNA showing the formation of parallel G-quadruplexes templated on the SNA surface.
